# Supplementary material for: Spectroscopic-Chemical Fingerprint and Biostimulant Activity of a Protein-Based Product in Solid Form
Source: PubMed Central journal article supplement (PMC6102567; doi:10.3390/molecules23051031), 2018-04-27
Supplement: molecules-23-01031-s001.pdf [file molecules-23-01031-s001.pdf]

# Supplementary material

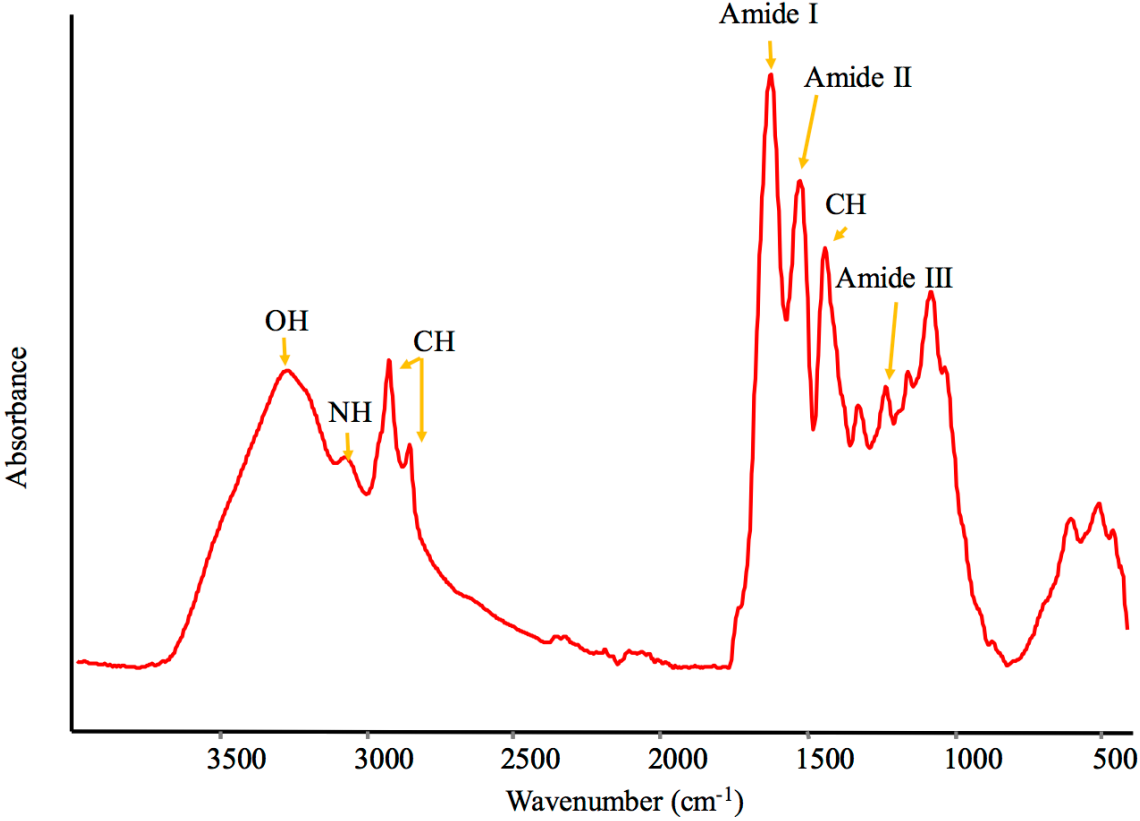

Figure 1S. FT-IR spectrum of AA309.

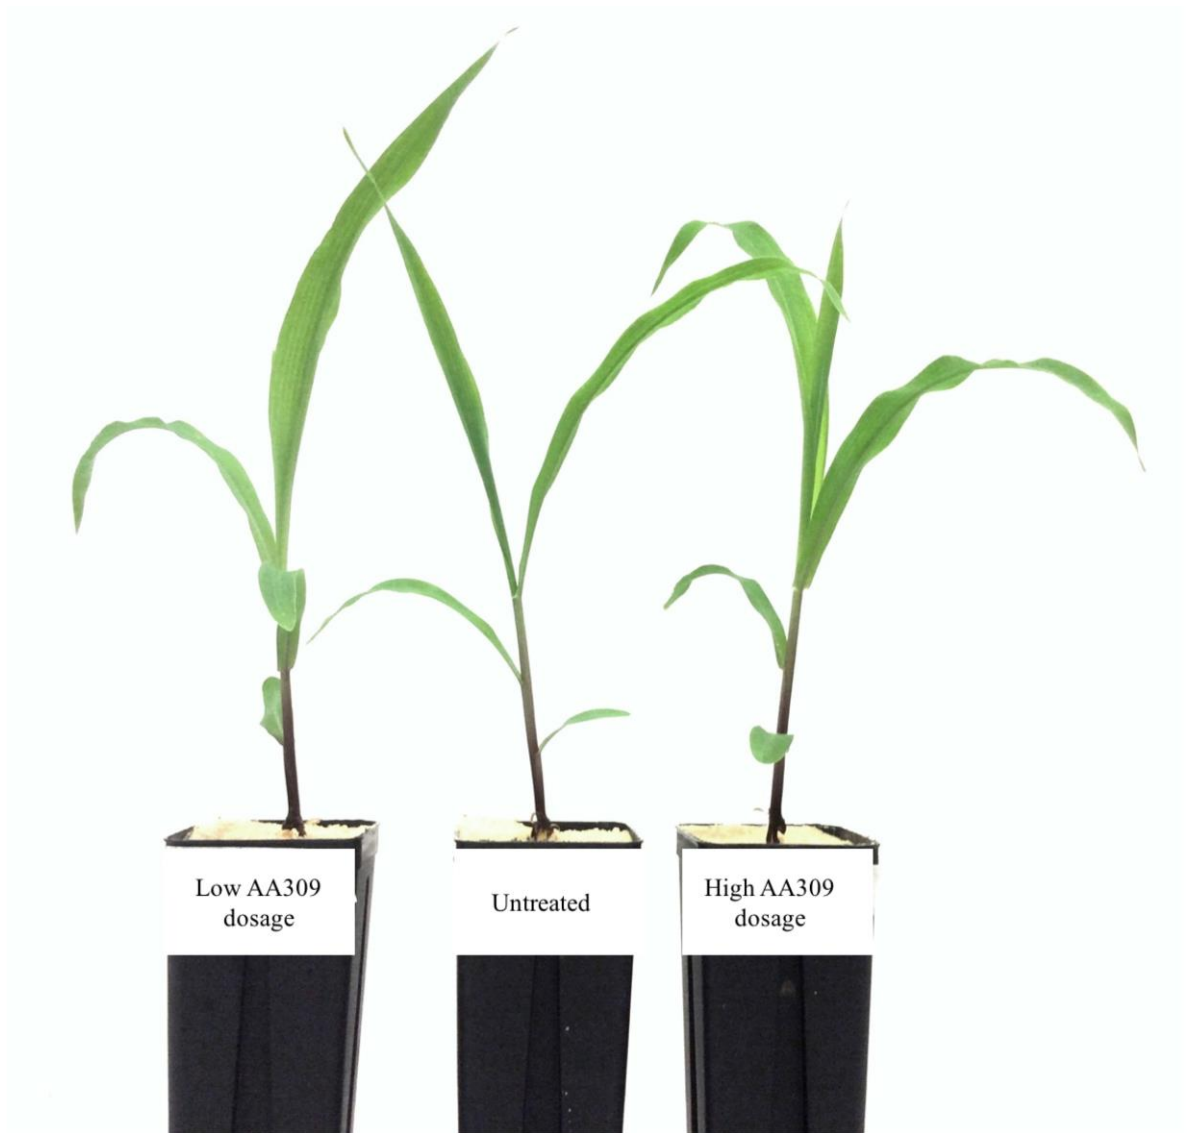

**Figure 2S.** Maize plants grown for 15 days in sand with or without AA309. C=control, LD= Low AA309 dosage (= 2.1 mg/kg N); HD= High AA309 dosage (= 4.2 mg/kg N).
